# Supplementary material for: Effects of time, anticoagulant and detection channel on platelet count in ethylenediaminetetraacetic acid (EDTA)-dependent pseudothrombocytopenia
Source: PeerJ journal article supplement (doi:10.7717/peerj.19103), 2025-03-04
Supplement: Supplemental_data_1.xlsx [file Supplemental_data_1.xlsx]

## Sheet: Sheet1
	Sysmex XN-9100	0-5min		15min		30min		60min				0-5min		15min		30min		60min			0-5min		15min		30min		60min
	PLT-I	EDTA	Sodium citrate	EDTA	Sodium citrate	EDTA	Sodium citrate	EDTA	Sodium citrate		PLT-O	EDTA	Sodium citrate	EDTA	Sodium citrate	EDTA	Sodium citrate	EDTA	Sodium citrate	PLT-F	EDTA	Sodium citrate	EDTA	Sodium citrate	EDTA	Sodium citrate	EDTA	Sodium citrate
	1	243	243	160	216	44	183	22	161		1	250	267	167	220	62	183	32	169	1	255	270	206	244	83	210	45	191
	2	187	168	170	127	90	112	111	93		2	193	182	171	151	103	120	128	104	2	212	211	195	177	112	140	142	120
	3	228	220	79	207	49	127	61	62		3	216	236	106	229	80	121	90	71	3	238	263	121	240	85	146	94	80
	4	28	109	111	137	114	88	96	52		4	39	118	108	138	103	93	93	63	4	58	159	119	164	115	140	98	119
	5	12	122	7	76	10	52	8	75		5	15	144	10	105	11	92	7	90	5	41	166	25	143	19	128	9	126
	6	-	-	-	-	-	-	15	92		6	-	-	-	-	-	-	16	140	6	-	-	-	-	-	-	19	217
	7	252	191	228	170	154	148	33	84		7	240	180	214	183	154	146	44	90	7	264	215	237	133	167	178	50	125
	8	160	143	125	127	99	130	55	104		8	164	155	116	123	96	141	66	89	8	176	172	132	166	105	164	69	133
	9	-	-	100	140	123	162	72	146		9	-	-	114	152	113	143	86	136	9	-	-	150	213	137	191	105	181
	10	-	-	-	-	-	-	30	-		10	-	-	-	-	-	-	40	-	10	-	-	-	-	-	-	44	-
	11	261	250	186	247	176	217	149	193		11	285	250	213	279	175	209	154	190	11	290	288	237	271	197	236	175	220
	12	8	203	4	212	4	153	3	143		12	85	229	29	214	7	163	6	133	12	160	253	107	237	26	209	16	170
	13	312	-	201	-	162	-	142	-		13	314		221		165		153		13	350		247		184		168
	14	229	219	188	174	96	166	78	168		14	232	230	192	178	106	160	89	151	14	254	239	208	210	120	183	109	188
	15	138	122	58	92	33	80	44	51		15	127	121	61	100	36	69	45	44	15	142	137	67	122	39	98	51	71
	16	-	-	57	92	34	47	23	49		16	-	-	62	94	39	62	25	53	16	-	-	74	112	49	86	30	69
	17							36			17							52		17							67
	18							14	154		18							21	134	18							29	159
	19	119	83	135	57	133	33	122	42		19	134	93	122	68	124	46	118	42	19	157	131	134	113	131	89	126	70
	20							7			20							101		20							111
	21	261	227	233	213	145	193	63	172		21	230	233	197	198	130	181	65	159	21	266	261	228	230	152	210	75	181
	22	152	122	130	108	59	46	31	30		22	134	126	123	96	66	50	36	30	22	148	140	136	123	79	72	45	42
	23	227	199	121	184	64	146	46	104		23	188	196	118	179	74	140	52	113	23	221	219	129	198	81	174	55	152
	24	237	207	86	109	52	82	43	89		24	220	194	98	142	43	86	31	98	24	235	223	111	183	59	152	41	152
	25	19	189	10	171	12	151	9	122		25	70	183	13	170	10	168	8	149	25	117	206	17	196	11	184	10	174
	26	165	168	97	149	81	112	82	81		26	148	171	86	133	80	91	67	74	26	172	187	109	161	90	133	79	106
	27	84	78	82	71	77	57	60	48		27	76	72	78	64	75	57	69	47	27	83	81	79	69	73	59	64	50
	28	22	262	28	246	51	193	36	190		28	285	290	216	271	132	254	47	226	28	348	329	297	309	204	291	73	268
	29					27	180	23	136		29					35	160	28	136	29					41	189	35	167
	30	50	196	14	172	15	127	17	121		30	122	195	27	160	21	127	17	119	30	181	224	53	187	34	154	29	142
	31	211	181	187	180	153	142	101	110		31	198	180	180	171	149	134	98	103	31	207	198	183	186	164	157	105	120
	32	250	257	149	167	106	197	79	40		32	225	233	162	202	96	186	70	54	32	252	259	164	234	109	206	84	118
	33	116	120	90	102	57	67	36	33		33	107	106	79	97	55	78	39	52	33	120	117	88	98	58	92	40	67
	34	167	154	175	122	104	87	72	66		34	174	182	162	136	119	110	80	87	34	193	199	188	166	136	137	94	117
	35	153	161	51	113	44	97	32	88		35	163	190	68	142	58	122	37	120	35	181	219	75	176	60	154	39	144
	36	241	238	169	211	186	174	111	111		36	235	232	211	226	206	201	135	184	36	253	254	242	247	243	220	165	211
	37	184	194	83	129	82	104	73	71		37	192	212	85	141	83	114	77	138	37	206	232	100	209	91	176	84	168
	38	209	178	92	130	61	76	49	87		38	216	201	104	150	70	104	61	88	38	240	238	120	182	84	149	62	133
	39	169	150	136	150	145	106	87	92		39	173	161	144	144	135	109	95	59	39	195	182	164	172	164	131	105	101
	40	144	129	90	116	88	91	54	79		40	137	134	105	120	90	84	56	68	40	151	146	130	138	107	112	70	90
	41	169	135	95	131	25	126	18	121		41	170	139	105	138	33	122	20	119	41	172	156	113	152	35	144	22	130
		0-5min		15min		30min		60min				0-5min		15min		30min		60min
	Mindray BC6900	EDTA	Sodium citrate	EDTA	Sodium citrate	EDTA	Sodium citrate	EDTA	Sodium citrate	Mindray BC6900		EDTA	Sodium citrate	EDTA	Sodium citrate	EDTA	Sodium citrate	EDTA	Sodium citrate
	1	224	236	77	217	37	-	30	88		1	248	238	247	209	246	-	239	170
	2	198	177	148	113	171	91	155	76		2	201	189	195	161	196	134	191	113
	3	180	228	135	172	-	92	161	73		3	260	244	270	212	-	163	242	132
	4	137	182	147	176	135	131	137	77		4	179	187	165	170	153	149	158	140
	5	70	168	5	147	8	136	12	122		5	209	196	188	171	172	155	167	155
	6	-	-	-	-	-	-	18	203		6	-	-	-	-	-	-	102	226
	7	257	167	153	126	90	153	43	111		7	248	178	220	168	176	162	110	149
	8	154	127	85	126	50	74	57	81		8	162	157	131	144	90	137	88	117
	9	-	-	128	141	110	158	90	98		9	-	-	243	208	234	181	208	170
	10	-	-	-	-	-	-	45	-		10	-	-	-	-	-	-	107	-
	11	270	240	267	248	219	234	171	193		11	274	247	273	252	271	238	249	193
	12	21	212	19	218	8	189	9	171		12	253	239	235	222	229	207	175	178
	13	302		257		152		144			13	305		294		260		253
	14	232	258	152	180						14	236	261	218	186
	15	136	128	90	124	35	102	47	82		15	134	134	129	120	67	108	108	89
	16	-	-	47	79	28	56	15	42		16	-	-	65	101	49	84	32	72
	17							35			17							122
	18							26	161		18							140	161
	19	154	155	112	113	134	49	129	56		19	166	158	168	149	166	121	158	99
	20							6			20							177
	21	241	218	232	207	204	187	92	174		21	253	253	253	226	229	207	203	181
	22	136	126	140	96	98	52	41	41		22	141	142	133	128	130	117	120	92
	23	204	191	155	180	81	161	96	114		23	200	196	170	188	124	181	91	163
	24	226	193	125	128	77	153	72	94		24	219	226	218	187	219	167	136	143
	25	17	189	10	171	10	157	6	118		25	208	204	207	192	193	179	180	169
	26	175	171	111	156	84	138	72	117		26	172	181	171	164	123	141	102	121
	27	83	73	79	66	66	56	60	39		27	87	77	80	66	76	58	76	46
	28	75	278	44	262	85	250	88	53		28	329	308	333	291	339	266	322	247
	29					31	167	19	143		29					106	182	121	158
	30	123	201	30	184	16	128	22	104		30	219	217	222	181	204	151	193	129
	31	197	192	186	176	167	166	119	133		31	201	191	185	184	177	167	159	148
	32	256	247	141	162	97	187	97	141		32	241	242	204	213	197	191	190	158
	33	119	116	114	118	49	98	31	60		33	112	113	111	112	72	93	55	74
	34	178	167	179	112	170	107	117	103		34	183	172	178	164	175	147	170	118
	35	121	138	55	127	47	114	36	88		35	186	177	148	167	141	134	123	123
	36	257	247	254	224	239	187	226	159		36	254	241	251	231	251	214	252	206
	37	118	116	108	119	117	119	87	120		37	219	222	215	222	162	209	178	164
	38	211	189	103	153	68	96	51	88		38	219	219	202	178	165	160	139	138
	39	179	165	169	154	157	124	139	90		39	183	178	180	150	180	128	175	108
	40	120	91	97	123	91	94	69	84		40	140	103	143	128	144	113	146	96
	41	165	139	57	116	19	124	13	123		41	170	140	82	136	52	130	42	113
	Mindray BC5390	0-5min		15min		30min		60min
		EDTA	Sodium citrate	EDTA	Sodium citrate	EDTA	Sodium citrate	EDTA	Sodium citrate
	1	196	216	120	168	-	101	117	71
	2	152	176	132	146	102	122	105	75
	3	27	143	21	141	12	123	13	162
	4	-	-	-	-	-	-	27	226
	5	240	182	222	145	95	134	56	117
	6	191	174	79	117	73	108	53	109
	7	-	-	141	162	118	152	93	107
	8	-	-	-	-	-	-	42	-
	9	284	262	240	257	182	228	157	201
	10	177	242	75	194	25	163	12	172
	11	292		210		167		133
	12	227	208	135	176
	13	139	132	81	123	41	114	50	89
	14	-	-	54	97	35	62	25	50
	15							59
	16							36	157
	17	166	165	133	120	120	90	132	59
	18							10
	19	257	236	231	199	179	178	95	164
	20	136	124	143	93	82	45	41	34
	21	257	236	231	199	179	178	95	164
	22	136	124	143	93	82	45	41	34
	23	199	193	160	164	79	127	0	97
	24	208	198	185	88	85	56	51	76
	25	122	178	13	163	8	135	7	103
	26	181	171	128	157	82	148	71	108
	27	83	79	78	68	73	61	67	47
	28	103	289	46	260	58	226	43	79
	29					33	158	35	131
	30	216	216	95	192	33	132	36	189
	31	199	197	189	173	157	181	89	133
	32	258	245	163	214	121	144	91	159
	33	128	128	119	117	45	89	36	57
	34	191	187	191	111	174	72	116	103
	35	186	199	69	148	60	127	43	111
	36	275	279	238	250	214	211	204	196
	37	205	221	101	178	92	147	81	156
	38	238	263	179	188	87	74	57	113
	39	196	194	150	169	158	137	119	97
	40	156	149	135	126	110	102	71	93
	41	167	142	90	145	30	139	23	123
			EDTA					sodium citrate
	Sample 42	0-5min	15min	30min	60min			0-5min	15min	30min	60min
	PLT-I	189	124	39	32			199	76	30	26
XN-9100	PLT-O	178	140	113	97			183	139	126	89
	PLT-F	205	155	125	95			217	148	120	100
BC-6900	PLT-I	204	199	103	13			105	89	54	31
	PLT-O	237	235	235	190			216	183	213	217
BC5390	PLT-I	212	208	176	128			236	231	196	142
	Sample 43	0-5min	15min	30min	60min			0-5min	15min	30min	60min
	PLT-I	175	112	81	57			181	174	109	41
XN-9100	PLT-O	176	126	99	64			207	190	138	100
	PLT-F	205	138	109	73			230	218	177	148
BC-6900	PLT-I	208	108	82	59			191	151	136	100
	PLT-O	206	178	160	143			211	176	164	143
BC5390	PLT-I	221	117	85	71			231	186	127	100
	Sample 44	0-5min	15min	30min	60min			0-5min	15min	30min	60min
	PLT-I	169	95	25	18			150	146	138	134
XN-9100	PLT-O	170	105	33	20			154	153	144	132
	PLT-F	172	113	35	22			173	170	161	144
BC-6900	PLT-I	165	57	19	13			154	129	138	137
	PLT-O	170	151	144	126			156	82	52	42
BC5390	PLT-I	167	90	30	23			168	162	155	137
	Sample 45	0-5min	15min	30min	60min			0-5min	15min	30min	60min
	PLT-I	151	125	59	52			141	128	106	81
XN-9100	PLT-O	159	128	73	60			164	138	109	77
	PLT-F	154	126	73	58			166	142	114	91
BC-6900	PLT-I	152	98	64	55			130	116	96	94
	PLT-O	156	148	133	128			148	129	110	84
BC5390	PLT-I	152	106	62	48			182	163	117	89
	Sample 46	0-5min	15min	30min	60min			0-5min	15min	30min	60min
	PLT-I	182	112	71	77			171	110	66	51
XN-9100	PLT-O	173	112	92	86			174	127	83	72
	PLT-F	177	118	92	82			169	143	98	80
BC-6900	PLT-I	176	107	96	94			159	130	94	46
	PLT-O	190	187	183	188			163	144	127	93
BC5390	PLT-I	174	100	95	80			177	144	92	69
	Sample 47	0-5min	15min	30min	60min			0-5min	15min	30min	60min
	PLT-I	189	109	75	43			181	99	113	91
XN-9100	PLT-O	199	118	85	61			191	140	133	114
	PLT-F	195	130	84	55			200	162	151	130
BC-6900	PLT-I	191	137	68	53			188	163	139	112
	PLT-O	205	196	165	149			202	178	162	149
BC5390	PLT-I	204	132	76	56			204	173	130	115
	Sample 48	0-5min	15min	30min	60min			0-5min	15min	30min	60min
	PLT-I	147	72	31	23			171	156	108	110
XN-9100	PLT-O	162	90	38	29			188	174	134	124
	PLT-F	162	89	35	29			188	177	148	137
BC-6900	PLT-I	173	90	29	21			170	170	128	129
	PLT-O	186	159	147	103			184	193	174	151
BC5390	PLT-I	180	56	46	25			214	191	99	102
	Sample 49	0-5min	15min	30min	60min			0-5min	15min	30min	60min
	PLT-I	123	91	55	38			111	98	87.7778	82.2222
XN-9100	PLT-O	124	91	58	44			118	107	90	88.8889
	PLT-F	121	89	56	41			118	103	92.2222	90
BC-6900	PLT-I	131	92	60	40			113	109	95.5556	88.8889
	PLT-O	129	133	110	105			114	119	100	93.3333
BC5390	PLT-I	140	75	62	41			164	96	107.778	82.2222
	Sample50	0-5min	15min	30min	60min			0-5min	15min	30min	60min
	PLT-I	223	98	77	64			190	113	126.667	141.111
XN-9100	PLT-O	227	114	84	79			203	159	143.333	142.222
	PLT-F	215	110	86	72			209	173	158.889	156.667
BC-6900	PLT-I	227	105	76	89			200	131	157.778	157.778
	PLT-O	227	195	174	171			222	202	186.667	185.556
BC5390	PLT-I	228	111	83	80			253	120	116.667	84.4444
	Sample 51	0-5min	15min	30min	60min			0-5min	15min	30min	60min
	PLT-I	238	208	130	97			216	199	186.667	170
XN-9100	PLT-O	279	222	161	127			271	250	225.556	204.444
	PLT-F	280	242	166	139			271	246	228.889	221.111
BC-6900	PLT-I	257	222	139	109			236	226	220	181.111
	PLT-O	289	275	230	235			279	271	243.333	213.333
BC5390	PLT-I	236	185	127	110			259	227	190	212.222
